# Supplementary material for: GPR105-Targeted Therapy Promotes Gout Resolution as a Switch Between NETosis and Apoptosis of Neutrophils
Source: PubMed Central journal article supplement (PMC9005804; doi:10.3389/fimmu.2022.870183), 2022-03-30
Supplement: DataSheet_1.pdf [file DataSheet_1.pdf]

## **Supplementary Materials for**

### **GPR105-targeted therapy promotes gout resolution as a switch between NETosis and apoptosis of neutrophils**

Chunxiao Liu, Mengze Zhou, Wenjiao Jiang, Shumin Ye, Sheng Tian, Cheng Jiang, Hao Kun,

Huanqiu Li, Qinghua Hu

Correspondence to: [huqh@cpu.edu.cn](mailto:huqh@cpu.edu.cn)

**This PDF file includes:**

Supplementary Figures 1 to 8 and Supplementary Tables 1,2

## Supplementary Figures

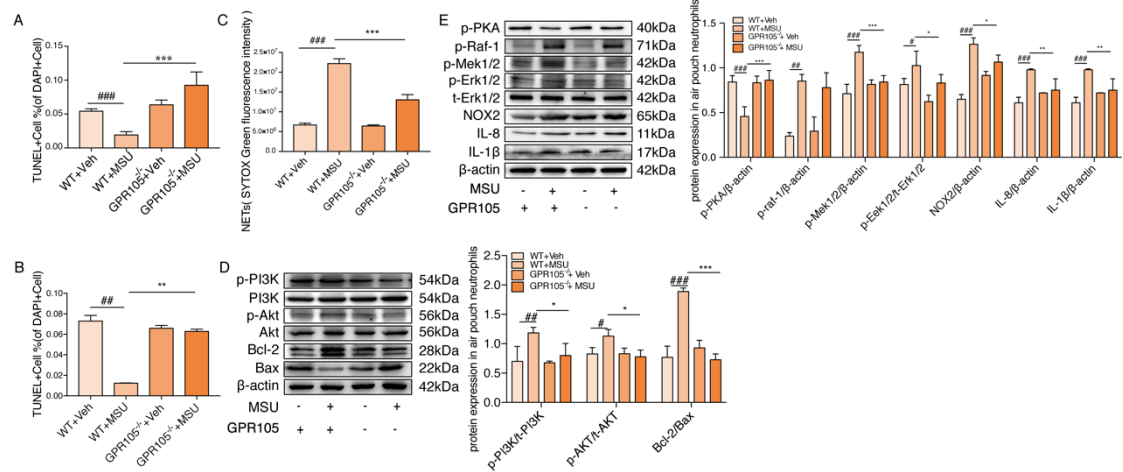

### Supplementary Fig. 1 GPR105<sup>-/-</sup> suppresses MSU-induced acute gouty inflammation, related

to Figures 1 and 2. **A** Quantitative analysis of TUNEL-positive cells in Figure 1F. The apoptotic

index was calculated as the number of TUNEL-positive cells/DAPI positive cells. **B** Quantitative

analysis of TUNEL-positive cells in Figure 2E. The apoptotic index was calculated as the number

of TUNEL-positive cells/DAPI positive cells. For **C** to **D**, GPR105<sup>-/-</sup> and WT rats were injected

with 5 mg/ml MSU into pre-formed air pouches on the backs. **C** Sytox green assay was used to

quantify neutrophil extracellular DNA release in air pouches (n=4). **D** Western blot analysis and

relative quantification of apoptosis-related proteins in air pouch neutrophils using the indicated

antibodies. **E** Western blot analysis and relative quantification of NETosis-related proteins in air

pouch neutrophils using the indicated antibodies. All representative blots shown are from four

independent experiments. All values are presented as the mean ± SD (<sup>#</sup>*P* < 0.05, <sup>##</sup>*P* < 0.01,

<sup>###</sup>*P* < 0.001 versus corresponding WT+Vehicle group. \**P* < 0.05; \*\**P* < 0.01; \*\*\**P* < 0.001 versus

corresponding WT+MSU group, One-Way ANOVA).

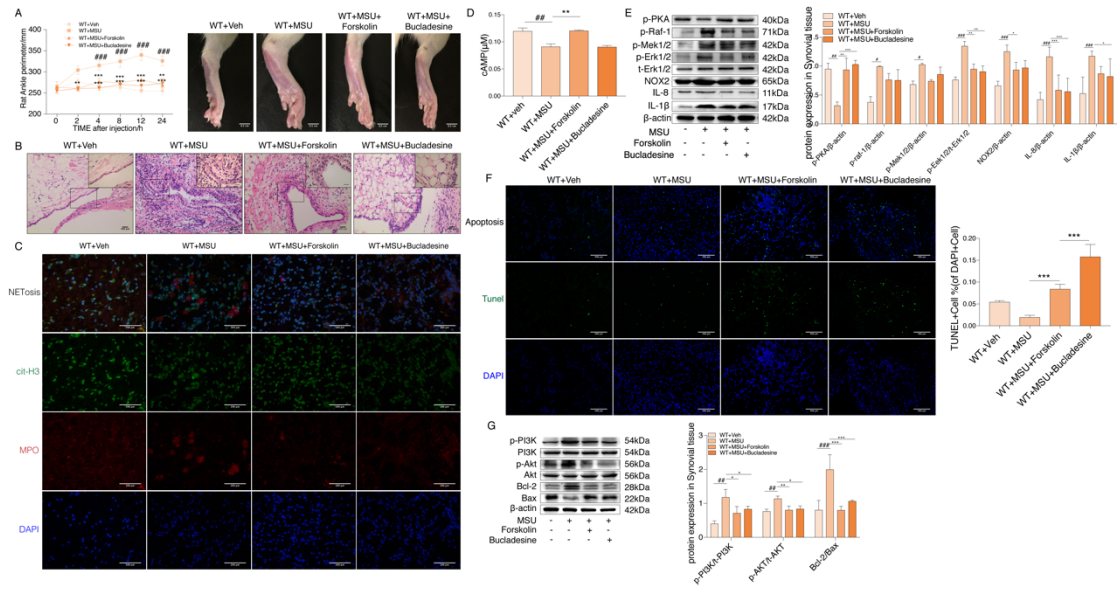

**Supplementary Fig. 2 Activation of cAMP-PKA pathway suppresses NETosis and promotes apoptosis *in vivo*.** WT rats were intra-articularly injected with 5 mg/ml MSU crystals to induce gouty arthritis. Rats were additionally treated with Forskolin (30  $\mu$ M), Bucladesine (300 $\mu$ M) or Veh respectively as indicated. **A** The ankle perimeter at 0, 2, 4, 8 12, 24 h after MSU injection. The representative photograph of ankle at 8 h after injection of MSU. **B** Histologic analyses of synovial membrane at 24 h after MSU injected. The small boxed areas show higher magnification views of the large boxes. **C** Representative images of synovial tissues infiltrating neutrophils (MPO, red) and presence of NETs (citruinated H3, green). **D** Intracellular cAMP levels of synovial tissue. **E** Western blot analysis and relative quantification of NETosis-related proteins in synovial tissues using the indicated antibodies. **F** Representative images of apoptosis cell (TUNEL, green) in synovial tissues. The apoptotic index was calculated as the number of TUNEL-positive cells/DAPI positive cells. **G** Western blot analysis and relative quantification of apoptosis-related proteins in synovial tissues using the indicated antibodies. All representative blots shown are from four independent experiments. All values are presented as the mean  $\pm$  SD ( $^{\#}P < 0.05$ ,  $^{\#\#}P < 0.01$ ,

### $P < 0.001$  versus corresponding WT+Vehicle group. \* $P < 0.05$ ; \*\* $P < 0.01$ ; \*\*\* $P < 0.001$  versus corresponding WT+MSU group, One-Way ANOVA).

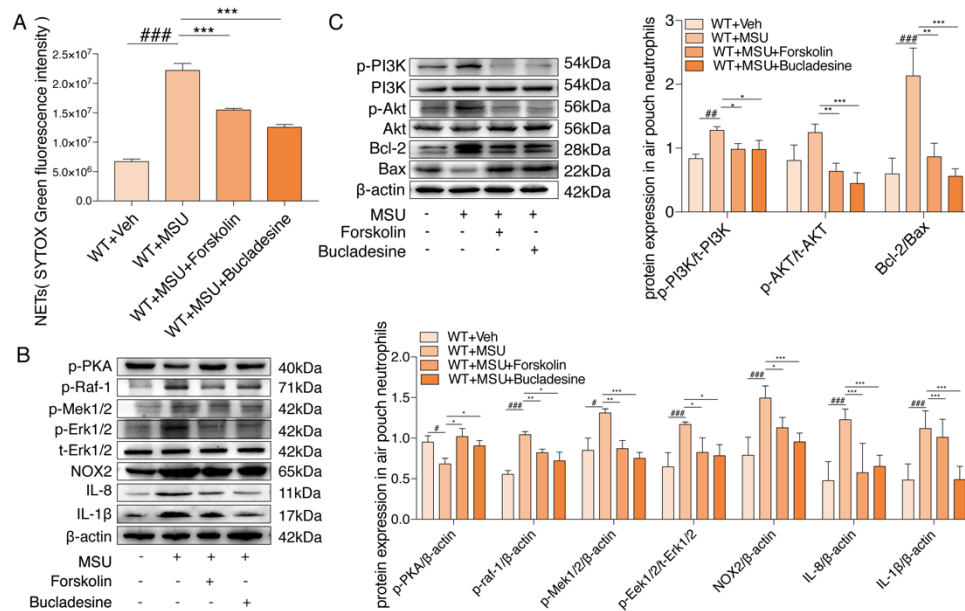

**Supplementary Fig. 3 Activation of cAMP-PKA pathway suppresses NETosis and promotes**

**apoptosis in air pouch model.** WT rats were injected with 5 mg/ml MSU into pre-formed air

pouches on the backs. Rats were additionally treated with Forskolin (30 μM), Bucladesine (300μM)

or Veh respectively as indicated. **A** Sytox green assay was used to quantify neutrophil extracellular

DNA release in air pouches 24 h after injection of MSU crystals in WT rats. **B** Western blot analysis

and relative quantification of NETosis-related proteins in air pouch neutrophils using the indicated

antibodies 24 h after MSU injected into pre-formed air pouches. **C** Western blot analysis and relative

quantification of apoptosis-related proteins in air pouch neutrophils using the indicated antibodies

24 h after MSU injected into pre-formed air pouches. All representative blots shown are from four

independent experiments. All values are presented as the mean ± SD. (<sup>#</sup> $P < 0.05$ , <sup>##</sup> $P < 0.01$ ,

<sup>###</sup> $P < 0.001$  versus corresponding WT+Vehicle group. \* $P < 0.05$ ; \*\* $P < 0.01$ ; \*\*\* $P < 0.001$  versus

corresponding WT+MSU group, One-Way ANOVA).

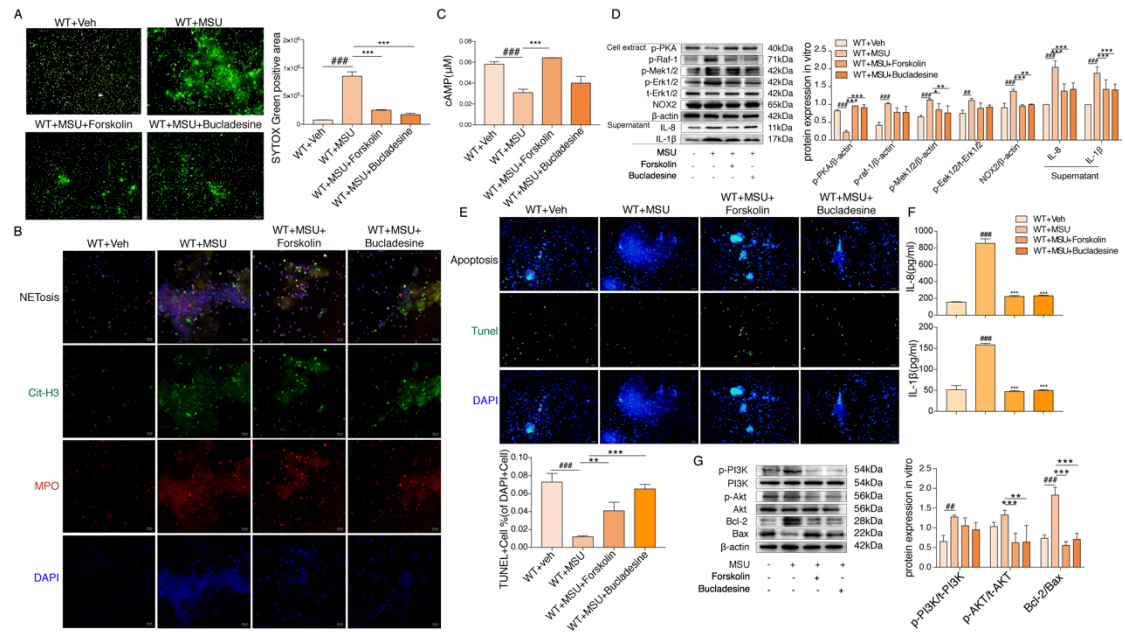

**Supplementary Fig. 4 Activation of cAMP-PKA pathway suppresses NETosis and promotes**

**apoptosis *in vitro*.** Primary Neutrophils were treated with 250 μg/ml MSU. Primary Neutrophils

were additionally incubated with Forskolin (30 μM), Bucladesine (300 μM) or Veh respectively as

indicated (n=3). **A** Representative microphotographs and relative quantification of extracellular

DNA staining (SYTOX green, green) in primary Neutrophils. **B** Representative microphotographs

of NETs formation (citrullinated H3, green and MPO, red) in primary Neutrophils. **C** Intracellular

concentration of cAMP in primary neutrophils. **D** Western blot analysis and relative quantification

of NETosis-related proteins in primary neutrophils using the indicated antibodies. Quantification of

the protein level of IL-1β and IL-8 in supernatant was expressed as the ratio of WT+Vehicle group.

**E** Representative images of apoptosis cell (TUNEL, green) in synovial tissues. The apoptotic index

was calculated as the number of TUNEL-positive cells/DAPI positive cells. **F** Levels of IL-8 and

IL-1β in the MSU-treated neutrophils supernatant measured by ELISA. **G** Western blot

analysis and relative quantification of apoptosis-related proteins in primary neutrophils using the

indicated antibodies. All representative blots shown are from three independent experiments. All

values are presented as the mean  $\pm$  SD ( $^{\#}P < 0.05$ ,  $^{\#\#}P < 0.01$ ,  $^{\#\#\#}P < 0.001$  versus corresponding WT+Vehicle group.  $^*P < 0.05$ ;  $^{**}P < 0.01$ ;  $^{***}P < 0.001$  versus corresponding WT+MSU group, One-Way ANOVA).

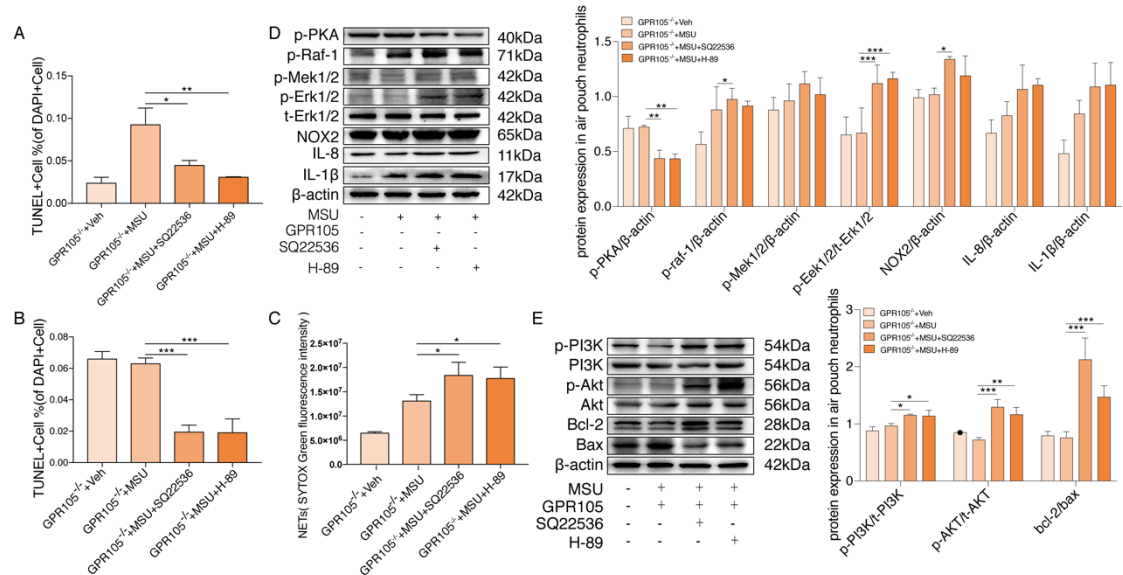

### Supplementary Fig. 5 Inhibition of cAMP-PKA pathway suppresses the effect of GPR105

knockout and switches apoptosis to NETosis, related to Figures 3 and 4. **A** and **B**, Quantitative

analysis of TUNEL-positive cells in Fig. 4E and Fig. 5D. The apoptotic index was calculated as the

number of TUNEL-positive cells/DAPI positive cells. For **C** to **E**, GPR105<sup>-/-</sup> rats were injected with

5 mg/ml MSU into pre-formed air pouches on the backs. Rats were additionally treated with

SQ22536 (100 μM), H-89 (10 μM) or DMSO respectively as indicated. **C** Sytox green assay was

used to quantify neutrophil extracellular DNA release in air pouches 24 h after injection of MSU

crystals in WT rats. **D** Western blot analysis and relative quantification of NETosis-related proteins

in air pouch neutrophils using the indicated antibodies 24 h after MSU crystals injected into pre-

formed air pouches. **E** Western blot analysis and relative quantification of apoptosis-related proteins

in air pouch neutrophils using the indicated antibodies 24 h after MSU crystals injected into pre-

formed air pouches. All representative blots shown are from three independent experiments. All values are presented as the mean  $\pm$  SD (\* $P$ <0.05; \*\* $P$ <0.01; \*\*\* $P$ <0.001 versus corresponding GPR105<sup>-/-</sup>+MSU group, One-Way ANOVA).

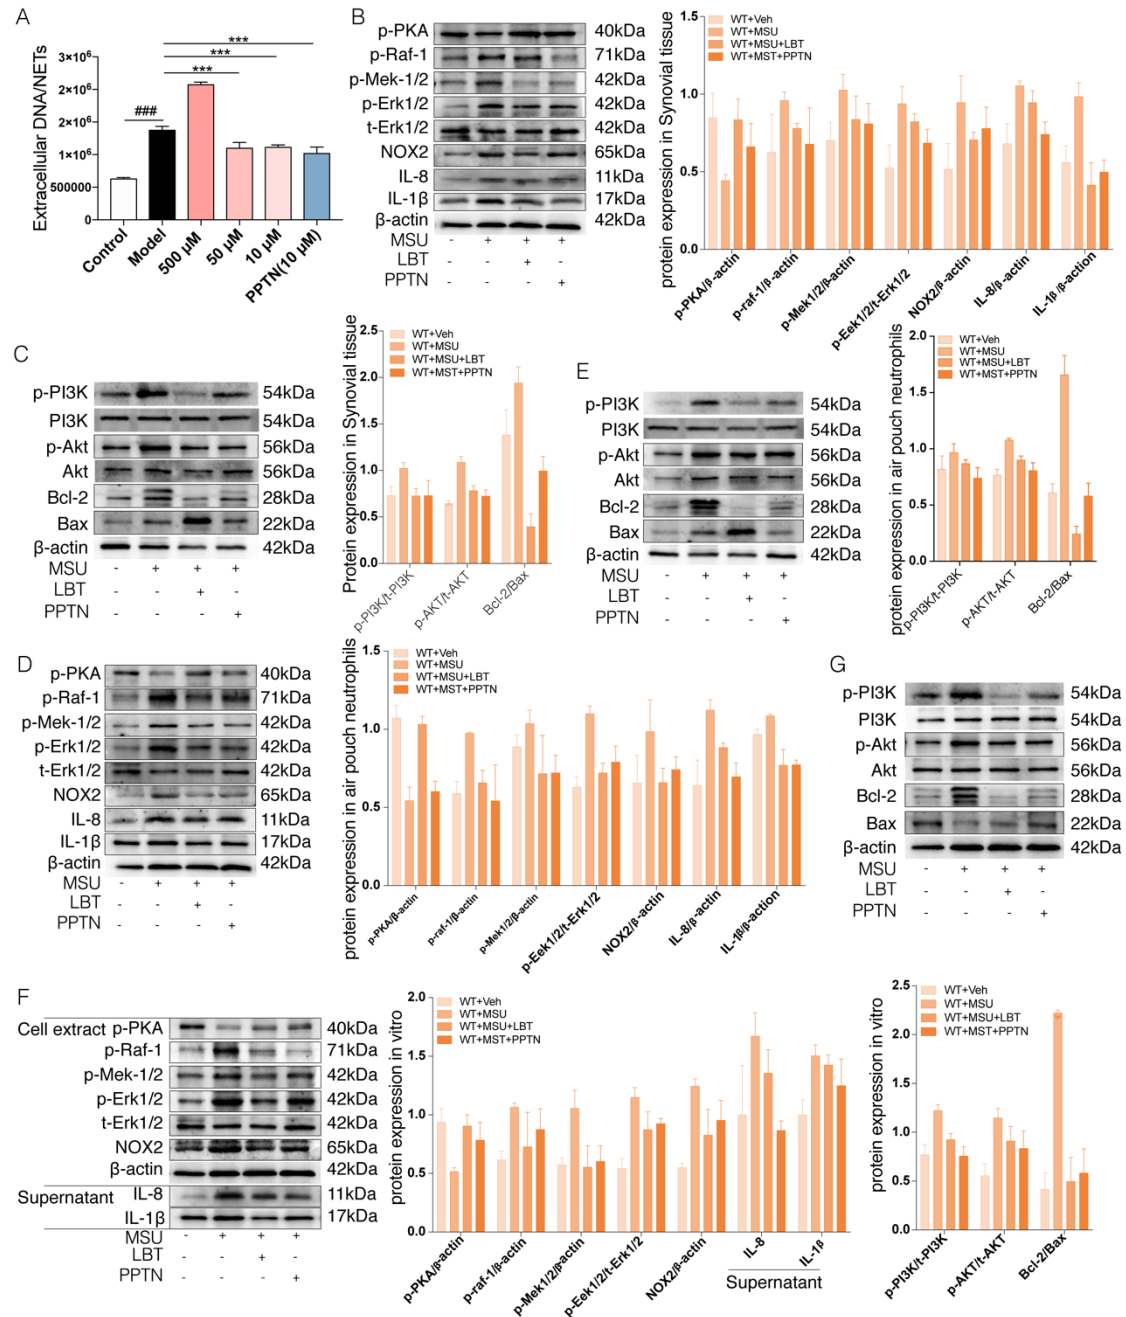

**Supplementary Fig. 6 LBT inhibition MSU-induced acute gouty arthritis in vivo and in vitro,**

related to Figures 5 and 6. **A** Effects of LBT and PPTN on levels of extracellular DNA in MSU-treated neutrophils. All values are presented as the mean  $\pm$  SD. (\* $P$ <0.05, \*\* $P$ <0.01, \*\*\* $P$ <0.001

versus corresponding Control. \* $P < 0.05$ ; \*\* $P < 0.01$ ; \*\*\* $P < 0.001$  versus Model group, One–Way ANOVA). For **B** to **C**, WT rats were intra-articularly injected with 5 mg/ml MSU to induce gouty arthritis. Rats were additionally treated with Lobetyolin (10  $\mu$ M) and PPTN (10 $\mu$ M) or Veh respectively as indicated. **B** Western blot analysis and relative quantification of NETosis-related proteins in synovial tissues. **C** Western blot analysis and relative quantification of apoptosis-related proteins in synovial tissues. For **D** to **E**, WT rats were injected with 5 mg/ml MSU crystals into pre-formed air pouches on the backs. Rats were additionally treated with LBT (10  $\mu$ M), PPTN (10  $\mu$ M) or Veh respectively as indicated. **D** Western blot analysis and relative quantification of NETosis-related proteins in air pouch neutrophils. **E** Western blot analysis and relative quantification of apoptosis-related proteins in air pouch neutrophils. For **F** to **G**, Primary Neutrophils were prepared from the bone marrow of WT rats and then treated with 250  $\mu$ g/ml MSU. Neutrophils were additionally incubated with LBT (10  $\mu$ M), PPTN (10  $\mu$ M) or Veh respectively as indicated. **F** Western blot analysis and relative quantification of NETosis-related proteins in primary neutrophils. Quantification of the protein level of IL-1 $\beta$  and IL-8 in supernatant was expressed as the ratio of WT+Vehicle group. **G** Western blot analysis and relative quantification of apoptosis-related proteins in primary neutrophils. All values are presented as the mean  $\pm$  SD. ( $\#P < 0.05$ ,  $\#\#P < 0.01$ ,  $\#\#\#P < 0.001$  versus corresponding WT+Vehicle group. \* $P < 0.05$ ; \*\* $P < 0.01$ ; \*\*\* $P < 0.001$  versus corresponding WT+MSU group, One–Way ANOVA).



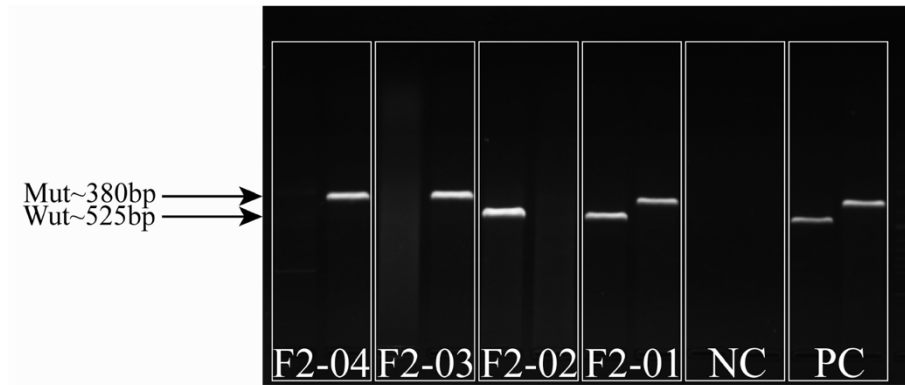

**Supplementary Fig. 7** Representative gene identification results of F2 generation rats. PC represents a positive control and NC represents a negative control.

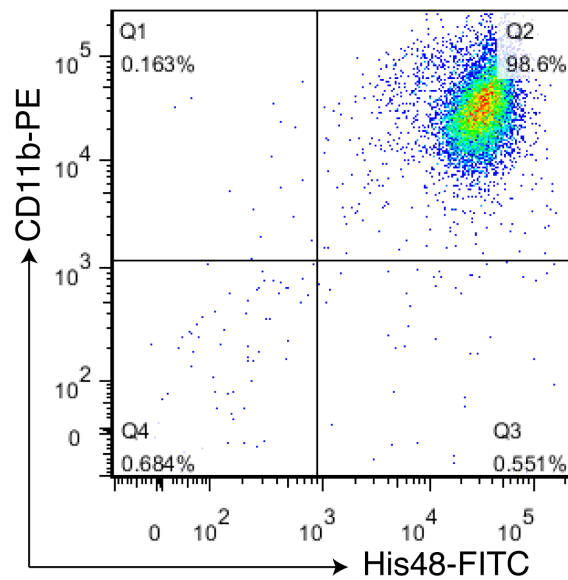

**Supplementary Fig. 8** Representative FACS images of CD11b/Hs48-stained neutrophils purified using RBC lysis and Histopaque methods.

## Supplementary Table

**Supplementary Table 1. Reagents and antibodies**

| Reagent                             |               |             |
|-------------------------------------|---------------|-------------|
| Reagent                             | Company       | Cat. No     |
| IBMX                                |               | I7018       |
| Ro 20-1724                          |               | B8279       |
| Uric acid sodium salt               | Sigma-Aldrich | U2875       |
| Histopaque-1119                     |               | 11191       |
| Histopaque-10771                    |               | 10771       |
| Forskolin                           |               | HY-15371    |
| SQ22536                             |               | HY-100396   |
| Bucladesine                         | MCE           | HY-B0764    |
| H-89                                |               | HY-15979    |
| cAMP-Glo™ Assay                     | Promega       | V1502       |
| In Situ Cell Death Detection Kit    | Roche         | 11684817910 |
| SYTOX Green Nucleic Acid Stain      | Thermo Fisher | S7020       |
| Lobetyolin                          | Topscience    | T3825       |
| All-In-One RT Master Mix Kit        | ABM           | G490        |
| AceQ Universal SYBR qPCR Master Mix | Vazyme        | Q511-02     |
| Antibody                            |               |             |
| Mouse anti-MPO                      |               | ab90810     |
| rabbit anti-cit-H3                  | Abcam         | ab5103      |

|                                               |             |            |
|-----------------------------------------------|-------------|------------|
| Goat anti-Mouse IgG H&L (Alexa Flour® 568)    |             | ab175473   |
| Donkey Anti-Rabbit IgG H&L (Alexa Flour® 647) |             | ab150075   |
| Monoclonal Antibody (HIS48)-FITC              | eBioscience | 11-0570-82 |
| CD11b/c Monoclonal Antibody (OX42)-PE         |             | 12-0110-82 |
| rabbit anti-Phospho-PKA alpha+beta            |             | bs-3725R   |
| rabbit anti-Phospho-Raf1(Ser338)              |             | bs-3377R   |
| rabbit anti-Phospho-MER1/2(Ser218+Ser222)     |             | bs-3270R   |
| rabbit anti-Erk1/2                            |             | bs-0022R   |
| rabbit anti-Phospho-ERK1/2 (Thr202+Tyr204)    |             | bs-3016R   |
| rabbit anti-NOX2                              |             | bs-3889R   |
| rabbit anti-PI3K                              |             | bs-3332R   |
| rabbit anti-Phospho-PI3K                      | BIOSS       | bs-3332R   |
| rabbit anti-Akt1+2+3                          |             | bs-6951R   |
| rabbit anti-Phospho-Akt (Ser473)              |             | bs-0876R   |
| rabbit anti-Bcl-2                             |             | bs-4563R   |
| rabbit anti-Bax                               |             | bs-0127R   |
| rabbit anti-IL-1Beta                          |             | bs-6319R   |
| rabbit anti-β-actin                           |             | bs-0061R   |
| goat anti- rabbit IgG HRP                     |             | bs-0295G   |
| rabbit anti-IL-8                              | Affinity    | DF-6998    |

**Supplementary Table 2. Primers**

---

Primers for Standard polymerase chain reaction

---

| Gene       | Forward (5' to 3')        | Reverse (5' to 3')        |
|------------|---------------------------|---------------------------|
| GPR105-WT  | CTTTGTAACCACTATGCCCAAGCAG | TGATTTGACTTAAGGCCCAGCAGTA |
| GPR105-Mut | AGGCAGGAGGAAGTGTCAGGT     | GCTCAGAGCCTTGCTTTTTGGTG   |

---

Primers for Real-time PCR

---

|         |                       |                         |
|---------|-----------------------|-------------------------|
| hGPR105 | TACGTGCCCAGCTCTAAGAGT | GTCACCAAGGATCTTGAAAGGAA |
| hGADPH  | ATCCCATCACCATCTTCCAGG | GATGACCCTTTTGGCTCCC     |

---
